# Supplementary material for: Insights into mycobacteriome composition in Mycobacterium bovis-infected African buffalo (Syncerus caffer) tissue samples
Source: PubMed Central journal article supplement (PMC11289279; doi:10.1038/s41598-024-68189-x), 2024-07-30
Supplement: 41598_2024_68189_MOESM1_ESM.pdf [file 41598_2024_68189_MOESM1_ESM.pdf]

# MinION Mk1C (MC-114017) Final report

30 May 23, 06:56 — 02 Jun 23, 04:20 · 30052023buff3sigdirect · no\_sample · MC-114017  
 Protocol run ID: 0980127d-3e0c-4171-a300-e882e567db99

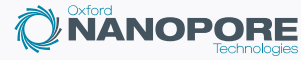

[Run summary](#) | [Run configuration](#) | [Sequence output](#) | [Run health](#) | [Run log](#)

## Run summary

### DATA OUTPUT

Estimated bases

18.81 Gb

Data produced

435.16 GB

Reads generated

23.52 M

Estimated N50

567

### RUN DURATION

Elapsed time

69 hours 25 minutes of 72 hours

Run status

**Stopped by user**

[View unit abbreviations used in this report](#)

### BASECALLING

Reads called

100%

Bases called (min Q score: 8)

14.46 Gb

1.47 Gb

Pass

Fail

## Run configuration

### RUN SETUP

|                      |               |
|----------------------|---------------|
| Flow cell type       | FLO-MIN106    |
| Flow cell type alias | FLO-MIN106    |
| Flow cell ID         | FAV36158      |
| Kit type             | SQK-NBD112-96 |

### RUN SETTINGS

|                            |            |
|----------------------------|------------|
| Specified run length       | 72 hrs     |
| Active channel selection   | On         |
| Pore scan freq.            | 1.5 hrs    |
| Reserved pores             | On         |
| Minimum read length        | 200 bp     |
| Read splitting             | On         |
| Basecalling                | Fast model |
| Modified basecalling       | Off        |
| Trim barcodes              | Off        |
| Mid-read barcode filtering | Off        |

### DATA OUTPUT SETTINGS

|                      |                                                                                   |
|----------------------|-----------------------------------------------------------------------------------|
| FAST5 output         | vbz_compress                                                                      |
| FAST5 reads per file | 4000                                                                              |
| FASTQ output         | gzip_compress                                                                     |
| FASTQ reads per file | 4000                                                                              |
| BAM output           | Off                                                                               |
| Bulk file output     | Off                                                                               |
| Data location        | /data/.30052023buff3sigdirect/no_sample/20230530_0656_MC-114017_FAV36158_0980127d |

### SOFTWARE VERSIONS

|               |         |
|---------------|---------|
| MinKNOW       | 22.12.5 |
| Bream         | 7.4.8   |
| Configuration | 5.4.7   |
| Guppy         | 6.4.6   |
| MinKNOW Core  | 5.4.3   |

## Sequence output

### READ LENGTHS · OUTLIERS REMOVED

The read length graph shows the total number of bases vs the read length. The longest 1% of strands are classified as outliers, and excluded to allow focus on the main body of data.

Legend

■ Basecalled — Estimated

Estimated N50

567

% Basecalled

100%

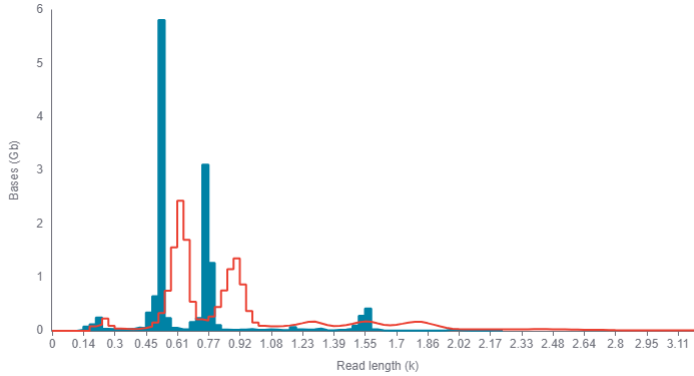

### OUTLIERS

The longest 1% of strands are classified as outliers, and aggregated into groups to show their relative amounts.

| Read length (kb) | Aggregated reads (Mb) |
|------------------|-----------------------|
| 0 - 64           | 143.71                |
| 64 - 128         | 0.32                  |
| 128 - 192        | None                  |
| 192 - 256        | 0.26                  |
| 256 - 268        | 0.27                  |

### BARCODED READS

The total number of bases for each barcode is calculated and displayed below.

| Total bases (Gb) | Barcodes                                                                                                                                                                                                                                                                                                                                                                                                                                                                                                                                                                                                                                                                                                                                                                                                                                                                                                                                                                                                                                                                                                                                                                                                                                                                                                                                                                                                                                                                                                                                                                                                                                                                                                                                                                                                                                                                                                                                                                                                                                                                                                                                                                                                                                                                                                                                                                                                          |
|------------------|-------------------------------------------------------------------------------------------------------------------------------------------------------------------------------------------------------------------------------------------------------------------------------------------------------------------------------------------------------------------------------------------------------------------------------------------------------------------------------------------------------------------------------------------------------------------------------------------------------------------------------------------------------------------------------------------------------------------------------------------------------------------------------------------------------------------------------------------------------------------------------------------------------------------------------------------------------------------------------------------------------------------------------------------------------------------------------------------------------------------------------------------------------------------------------------------------------------------------------------------------------------------------------------------------------------------------------------------------------------------------------------------------------------------------------------------------------------------------------------------------------------------------------------------------------------------------------------------------------------------------------------------------------------------------------------------------------------------------------------------------------------------------------------------------------------------------------------------------------------------------------------------------------------------------------------------------------------------------------------------------------------------------------------------------------------------------------------------------------------------------------------------------------------------------------------------------------------------------------------------------------------------------------------------------------------------------------------------------------------------------------------------------------------------|
| 0-1              | barcode01 (Reads: 143187) barcode02 (Reads: 185787) barcode03 (Reads: 223032) barcode04 (Reads: 225580) barcode05 (Reads: 234421) barcode06 (Reads: 345558) barcode07 (Reads: 94789) barcode08 (Reads: 256395) barcode09 (Reads: 291960) barcode10 (Reads: 411909) barcode11 (Reads: 426547) barcode12 (Reads: 219454) barcode13 (Reads: 720581) barcode14 (Reads: 222972) barcode15 (Reads: 204359) barcode16 (Reads: 389719) barcode17 (Reads: 507614) barcode18 (Reads: 438299) barcode19 (Reads: 243830) barcode20 (Reads: 519741) barcode21 (Reads: 600790) barcode22 (Reads: 638707) barcode23 (Reads: 480825) barcode24 (Reads: 401747) barcode25 (Reads: 543477) barcode26 (Reads: 494409) barcode27 (Reads: 637282) barcode28 (Reads: 644290) barcode29 (Reads: 588575) barcode30 (Reads: 570988) barcode31 (Reads: 540071) barcode32 (Reads: 563289) barcode33 (Reads: 711671) barcode34 (Reads: 573163) barcode35 (Reads: 756804) barcode36 (Reads: 1113614) barcode37 (Reads: 679936) barcode38 (Reads: 279384) barcode39 (Reads: 217007) barcode40 (Reads: 263073) barcode41 (Reads: 431716) barcode42 (Reads: 269907) barcode43 (Reads: 257685) barcode44 (Reads: 267674) barcode45 (Reads: 363303) barcode46 (Reads: 246326) barcode47 (Reads: 353936) barcode48 (Reads: 283064) barcode49 (Reads: 376332) barcode50 (Reads: 341726) barcode51 (Reads: 285223) barcode52 (Reads: 353499) barcode53 (Reads: 269599) barcode54 (Reads: 269678) barcode55 (Reads: 293289) barcode56 (Reads: 309239) barcode57 (Reads: 20) barcode58 (Reads: 112) barcode59 (Reads: 8) barcode60 (Reads: 14) barcode61 (Reads: 23) barcode62 (Reads: 12) barcode63 (Reads: 4) barcode64 (Reads: 30) barcode65 (Reads: 8) barcode66 (Reads: 18) barcode67 (Reads: 29) barcode68 (Reads: 5) barcode69 (Reads: 17) barcode70 (Reads: 22) barcode71 (Reads: 13) barcode72 (Reads: 14) barcode73 (Reads: 6) barcode74 (Reads: 11) barcode75 (Reads: 21) barcode76 (Reads: 32) barcode77 (Reads: 5) barcode78 (Reads: 9) barcode79 (Reads: 31) barcode80 (Reads: 10) barcode81 (Reads: 8) barcode82 (Reads: 6) barcode83 (Reads: 49) barcode84 (Reads: 50) barcode85 (Reads: 5) barcode86 (Reads: 10) barcode87 (Reads: 14) barcode88 (Reads: 2) barcode89 (Reads: 19) barcode90 (Reads: 6) barcode91 (Reads: 12) barcode92 (Reads: 2) barcode93 (Reads: 5) barcode94 (Reads: 74) barcode95 (Reads: 9) barcode96 (Reads: 13) |

### CUMULATIVE OUTPUT

The cumulative output shows the total amount of bases or reads sequenced over time by your device.

#### Bases

Legend

— Estimated

Predicted total number of bases, prior to basecalling

— Passed

Bases equal to or above the quality score threshold.

— Failed

Bases below the quality score threshold.

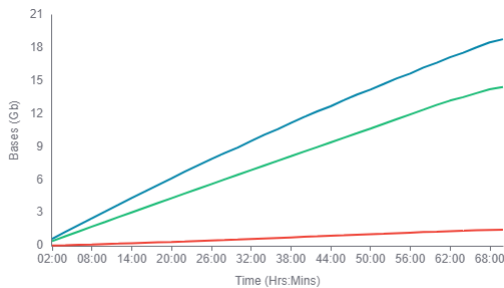

#### Reads

Legend

— Total

Total number of reads, including passed, failed and skipped.

— Passed

Reads equal to or above the quality score threshold.

— Failed

Reads below the quality score threshold.

— Skipped

Reads that will not be basecalled. Post run basecalling is possible.

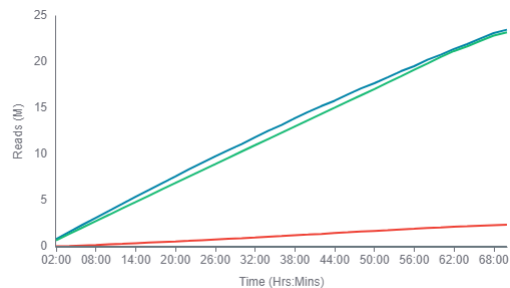

### QUALITY SCORE

The quality score is calculated as basecalling is performed on your device. Reads that fall below the minimum value of 8 will be classified as failed reads. You can alter the accepted minimum quality score in MinKNOW.

Legend

— Mode  
 The most frequent quality score of reads in the run.

- - - Spread  
 The spread of quality scores, found by calculating full width half maximum.

- - - Min. quality score  
 Minimum quality score to be accepted as a passed read.

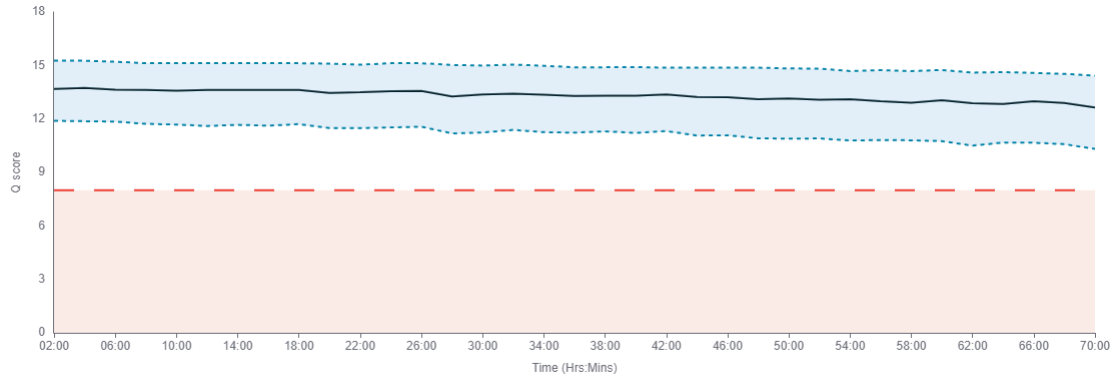

**Troubleshooting**

**Quality score low**  
 This can be due to the translocation speed being out of the accepted range, which can correlate to low quality scores. If you see that the translocation speed is out of the accepted range in the below graph, please see the Flow Cell refuelling page linked [here](#) for further troubleshooting.

**Run health**

**PORE ACTIVITY**

The Pore activity graph shows the performance of your sample as it is being sequenced during a run.

**Legend**

- Sequencing  
Pore currently sequencing
- Adapter  
Pore currently sequencing adapter
- Pore available  
Pore available for sequencing
- Unavailable  
Pore unavailable for sequencing
- Active feedback  
Channel ejecting analyte
- No pore  
No pore detected in channel
- Out of range-high  
Current is positive but unavailable for sequencing
- Out of range-low  
Current is negative but unavailable for sequencing
- Multiple  
Multiple pores detected. Unavailable for sequencing.
- Saturated  
The channel has switched off as current levels exceed hardware limitations
- Zero  
Pore currently unavailable for sequencing
- Channel disabled  
Channel is disabled and awaiting another pore scan
- Unclassified  
Pore status unknown

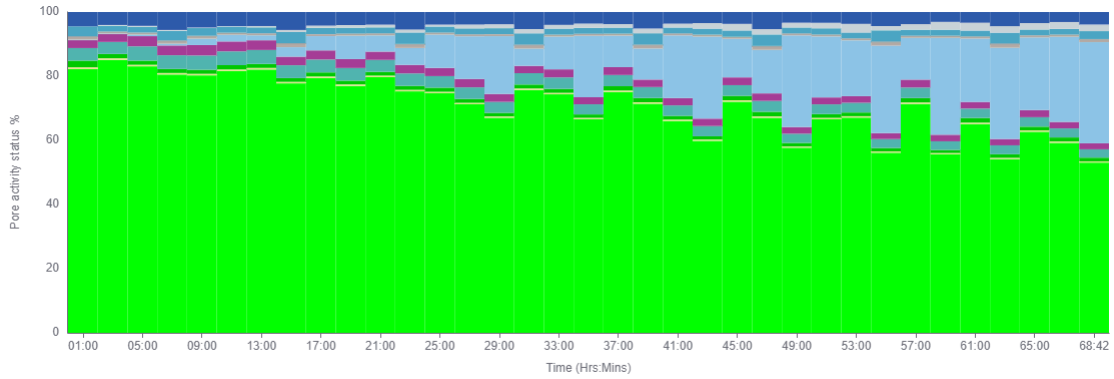

**Troubleshooting**

**General**  
 Some commonly seen issues are excess pores classified as Recovering, Open Pore, or Free Adapter. To find out what advice is applicable for your run, visit the [user guide](#).

### PORE SCAN

A Pore scan is performed at configurable time intervals to determine the current status of pores within channels on a Flow Cell. For this run a Pore scan is performed every 1.5 hrs.

Legend

- **Pore available**  
Pore in channel available for sequencing
- **Reserved pore**  
Pore in reserve, will return to available when required
- **Unavailable**  
Pore inhibited from sequencing
- **Saturated**  
Possible contamination in the sample
- **Zero**  
No current is passing through this pore, possibly due to bubbles on the membrane
- **Inactive**  
Pore no longer suitable for further sequencing

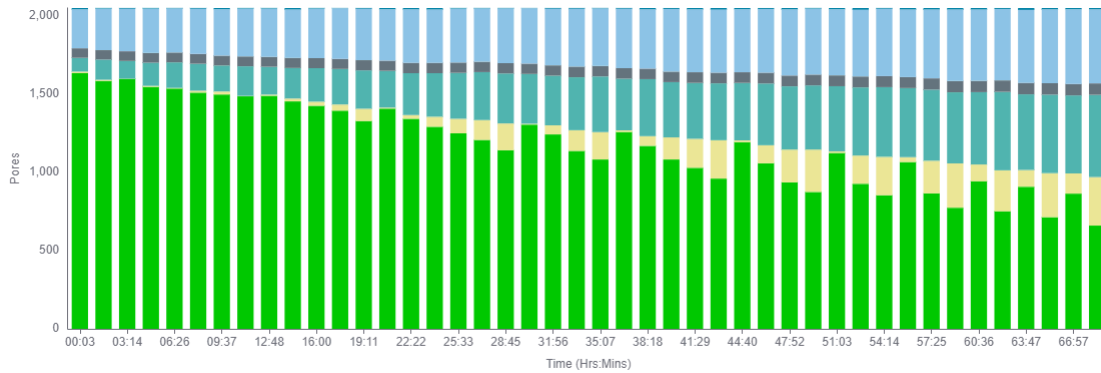

Troubleshooting

**High proportion Unavailable**  
Possible contaminants in library blocking the pore. Consider using the Flow Cell Wash Kit, and reloading a library.

**High proportion Inactive**  
If localised to one area of the Flow Cell, this could indicate that an air bubble has been introduced during the flushing/loading steps. If inactivity is spread across the Flow Cell this could be caused by improper loading of the library, please refer to the [user guide](#) for further support.

### TRANSLOCATION SPEED

The translocation speed is the rate at which DNA/RNA travels through pores as it is being sequenced.

Legend

- Median
- - - 75% quartile
- - - 25% quartile
- Accepted range

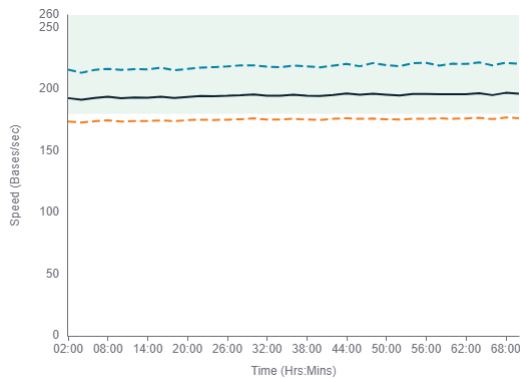

Troubleshooting

**Low speed**  
Check that the Flow Cell is within the target temperature range.

**Note**  
Low-quality and short reads are not included in this graph.

### TEMPERATURE

The temperature of the Flow Cell over the run time.

Legend

- Measured
- Target

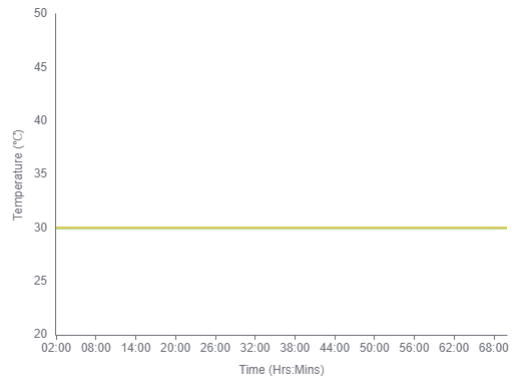

Troubleshooting

**Out of range**  
Check that the Flow Cell is correctly seated and firmly pushed down into the device. Ensure ambient temperature is always within the specified range for your device in the [user guide](#).

Air flow should be good but not excessive. Excessive amounts of cool air blowing on the device could prevent it from reaching target temperature.

## Run log

### SYSTEM MESSAGES

System messages are a record of the events that occurred in the time covered by this report.

#### Errors

None

#### Warnings

**Disk usage alert** · 01 Jun 23, 10:49

Disk usage alert – you only have 197 GB of space free, which is insufficient for the run. Please free up some space, otherwise your run will stop in approximately 1d 1h 58m.

#### Events

**Disk space** · 30 May 23, 06:56

Disk /data has 535 GB space remaining

**Waiting for temperature** · 30 May 23, 06:56

Waiting up to 300 seconds for temperature to stabilise at 30.0°C

**Starting** · 30 May 23, 06:56

Starting sequencing procedure

**Pore scan starting** · 30 May 23, 06:56

Performing Pore Scan

**Pore scan result** · 30 May 23, 07:00

Pore scan for flow cell FAV36158 has found a total of 1642 pores. 511 pores available for immediate sequencing

**Pore scan starting** · 30 May 23, 08:31

Performing Pore Scan

**Pore scan result** · 30 May 23, 08:36

Pore scan for flow cell FAV36158 has found a total of 1590 pores. 512 pores available for immediate sequencing

**Pore scan starting** · 30 May 23, 10:07

Performing Pore Scan

**Pore scan result** · 30 May 23, 10:11

Pore scan for flow cell FAV36158 has found a total of 1597 pores. 510 pores available for immediate sequencing

**Pore scan starting** · 30 May 23, 11:42

Performing Pore Scan

**Pore scan result** · 30 May 23, 11:47

Pore scan for flow cell FAV36158 has found a total of 1551 pores. 509 pores available for immediate sequencing

**Pore scan starting** · 30 May 23, 13:18

Performing Pore Scan

**Pore scan result** · 30 May 23, 13:23

Pore scan for flow cell FAV36158 has found a total of 1538 pores. 509 pores available for immediate sequencing

**Pore scan starting** · 30 May 23, 14:54

Performing Pore Scan

**Pore scan result** · 30 May 23, 14:58

Pore scan for flow cell FAV36158 has found a total of 1520 pores. 502 pores available for immediate sequencing

**Pore scan starting** · 30 May 23, 16:29

Performing Pore Scan

**Pore scan result** · 30 May 23, 16:34

Pore scan for flow cell FAV36158 has found a total of 1515 pores. 498 pores available for immediate sequencing

**Pore scan starting** · 30 May 23, 18:05

Performing Pore Scan

**Pore scan result** · 30 May 23, 18:10

Pore scan for flow cell FAV36158 has found a total of 1487 pores. 505 pores available for immediate sequencing

**Pore scan starting** · 30 May 23, 19:41

Performing Pore Scan

**Pore scan result** · 30 May 23, 19:45

Pore scan for flow cell FAV36158 has found a total of 1495 pores. 503 pores available for immediate sequencing

**Pore scan starting** · 30 May 23, 21:16

Performing Pore Scan

**Pore scan result** · 30 May 23, 21:21

Pore scan for flow cell FAV36158 has found a total of 1470 pores. 494 pores available for immediate sequencing

**Pore scan starting** · 30 May 23, 22:52

Performing Pore Scan

**Pore scan result** · 30 May 23, 22:56

Pore scan for flow cell FAV36158 has found a total of 1450 pores. 490 pores available for immediate sequencing

**Pore scan starting** · 31 May 23, 00:28

Performing Pore Scan

**Pore scan result** · 31 May 23, 00:32

Pore scan for flow cell FAV36158 has found a total of 1432 pores. 482 pores available for immediate sequencing

**Pore scan starting** · 31 May 23, 02:03

Performing Pore Scan

**Pore scan result** · 31 May 23, 02:08

Pore scan for flow cell FAV36158 has found a total of 1405 pores. 461 pores available for immediate sequencing

**Pore scan starting** · 31 May 23, 03:39

Performing Pore Scan

**Pore scan result** · 31 May 23, 03:43

Pore scan for flow cell FAV36158 has found a total of 1412 pores. 499 pores available for immediate sequencing

**Pore scan starting** · 31 May 23, 05:14

Performing Pore Scan

**Pore scan result** · 31 May 23, 05:19

Pore scan for flow cell FAV36158 has found a total of 1365 pores. 480 pores available for immediate sequencing

**Pore scan starting** · 31 May 23, 06:50

Performing Pore Scan

**Pore scan result** · 31 May 23, 06:55

Pore scan for flow cell FAV36158 has found a total of 1354 pores. 459 pores available for immediate sequencing

**Pore scan starting** · 31 May 23, 08:26

Performing Pore Scan

**Pore scan result** · 31 May 23, 08:30

Pore scan for flow cell FAV36158 has found a total of 1341 pores. 449 pores available for immediate sequencing

**Pore scan starting** · 31 May 23, 10:01

Performing Pore Scan

**Pore scan result** · 31 May 23, 10:06

Pore scan for flow cell FAV36158 has found a total of 1333 pores. 431 pores available for immediate sequencing

**Pore scan starting** · 31 May 23, 11:37

Performing Pore Scan

**Pore scan result** · 31 May 23, 11:41

Pore scan for flow cell FAV36158 has found a total of 1311 pores. 408 pores available for immediate sequencing  
**Pore scan starting** · 31 May 23, 13:13  
Performing Pore Scan  
**Pore scan result** · 31 May 23, 13:17  
Pore scan for flow cell FAV36158 has found a total of 1309 pores. 496 pores available for immediate sequencing  
**Pore scan starting** · 31 May 23, 14:48  
Performing Pore Scan  
**Pore scan result** · 31 May 23, 14:53  
Pore scan for flow cell FAV36158 has found a total of 1299 pores. 468 pores available for immediate sequencing  
**Pore scan starting** · 31 May 23, 16:24  
Performing Pore Scan  
**Pore scan result** · 31 May 23, 16:28  
Pore scan for flow cell FAV36158 has found a total of 1268 pores. 426 pores available for immediate sequencing  
**Pore scan starting** · 31 May 23, 17:59  
Performing Pore Scan  
**Pore scan result** · 31 May 23, 18:04  
Pore scan for flow cell FAV36158 has found a total of 1256 pores. 391 pores available for immediate sequencing  
**Pore scan starting** · 31 May 23, 19:35  
Performing Pore Scan  
**Pore scan result** · 31 May 23, 19:39  
Pore scan for flow cell FAV36158 has found a total of 1267 pores. 494 pores available for immediate sequencing  
**Pore scan starting** · 31 May 23, 21:10  
Performing Pore Scan  
**Pore scan result** · 31 May 23, 21:15  
Pore scan for flow cell FAV36158 has found a total of 1230 pores. 456 pores available for immediate sequencing  
**Pore scan starting** · 31 May 23, 22:46  
Performing Pore Scan  
**Pore scan result** · 31 May 23, 22:50  
Pore scan for flow cell FAV36158 has found a total of 1222 pores. 413 pores available for immediate sequencing  
**Pore scan starting** · 01 Jun 23, 00:22  
Performing Pore Scan  
**Pore scan result** · 01 Jun 23, 00:26  
Pore scan for flow cell FAV36158 has found a total of 1213 pores. 394 pores available for immediate sequencing  
**Pore scan starting** · 01 Jun 23, 01:57  
Performing Pore Scan  
**Pore scan result** · 01 Jun 23, 02:02  
Pore scan for flow cell FAV36158 has found a total of 1204 pores. 356 pores available for immediate sequencing  
**Pore scan starting** · 01 Jun 23, 03:33  
Performing Pore Scan  
**Pore scan result** · 01 Jun 23, 03:37  
Pore scan for flow cell FAV36158 has found a total of 1203 pores. 490 pores available for immediate sequencing  
**Pore scan starting** · 01 Jun 23, 05:08  
Performing Pore Scan  
**Pore scan result** · 01 Jun 23, 05:13  
Pore scan for flow cell FAV36158 has found a total of 1172 pores. 436 pores available for immediate sequencing  
**Pore scan starting** · 01 Jun 23, 06:44  
Performing Pore Scan  
**Pore scan result** · 01 Jun 23, 06:48  
Pore scan for flow cell FAV36158 has found a total of 1144 pores. 367 pores available for immediate sequencing  
**Pore scan starting** · 01 Jun 23, 08:20  
Performing Pore Scan  
**Pore scan result** · 01 Jun 23, 08:24  
Pore scan for flow cell FAV36158 has found a total of 1144 pores. 342 pores available for immediate sequencing  
**Pore scan starting** · 01 Jun 23, 09:55  
Performing Pore Scan  
**Pore scan result** · 01 Jun 23, 10:00  
Pore scan for flow cell FAV36158 has found a total of 1133 pores. 482 pores available for immediate sequencing  
**Pore scan starting** · 01 Jun 23, 11:31  
Performing Pore Scan  
**Pore scan result** · 01 Jun 23, 11:35  
Pore scan for flow cell FAV36158 has found a total of 1106 pores. 393 pores available for immediate sequencing  
**Pore scan starting** · 01 Jun 23, 13:06  
Performing Pore Scan  
**Pore scan result** · 01 Jun 23, 13:11  
Pore scan for flow cell FAV36158 has found a total of 1098 pores. 345 pores available for immediate sequencing  
**Pore scan starting** · 01 Jun 23, 14:42  
Performing Pore Scan  
**Pore scan result** · 01 Jun 23, 14:46  
Pore scan for flow cell FAV36158 has found a total of 1096 pores. 471 pores available for immediate sequencing  
**Pore scan starting** · 01 Jun 23, 16:17  
Performing Pore Scan  
**Pore scan result** · 01 Jun 23, 16:22  
Pore scan for flow cell FAV36158 has found a total of 1073 pores. 377 pores available for immediate sequencing  
**Pore scan starting** · 01 Jun 23, 17:52  
Performing Pore Scan  
**Pore scan result** · 01 Jun 23, 17:57  
Pore scan for flow cell FAV36158 has found a total of 1056 pores. 327 pores available for immediate sequencing  
**Pore scan starting** · 01 Jun 23, 19:28  
Performing Pore Scan  
**Pore scan result** · 01 Jun 23, 19:32  
Pore scan for flow cell FAV36158 has found a total of 1049 pores. 437 pores available for immediate sequencing  
**Pore scan starting** · 01 Jun 23, 21:03  
Performing Pore Scan  
**Pore scan result** · 01 Jun 23, 21:08  
Pore scan for flow cell FAV36158 has found a total of 1012 pores. 338 pores available for immediate sequencing  
**Pore scan starting** · 01 Jun 23, 22:39  
Performing Pore Scan  
**Pore scan result** · 01 Jun 23, 22:43  
Pore scan for flow cell FAV36158 has found a total of 1014 pores. 427 pores available for immediate sequencing  
**Pore scan starting** · 02 Jun 23, 00:14  
Performing Pore Scan  
**Pore scan result** · 02 Jun 23, 00:19  
Pore scan for flow cell FAV36158 has found a total of 994 pores. 318 pores available for immediate sequencing  
**Pore scan starting** · 02 Jun 23, 01:50  
Performing Pore Scan  
**Pore scan result** · 02 Jun 23, 01:54  
Pore scan for flow cell FAV36158 has found a total of 992 pores. 416 pores available for immediate sequencing  
**Pore scan starting** · 02 Jun 23, 03:25  
Performing Pore Scan  
**Pore scan result** · 02 Jun 23, 03:30

Pore scan for flow cell FAV36158 has found a total of 969 pores. 299 pores available for immediate sequencing

---

## UNIT ABBREVIATIONS

|          |    |
|----------|----|
| Byte     | B  |
| Kilobyte | KB |
| Megabyte | MB |
| Gigabyte | GB |
| Terabyte | TB |

|          |    |
|----------|----|
| Base     | b  |
| Kilobase | kb |
| Megabase | Mb |
| Gigabase | Gb |
| Terabase | Tb |

|         |      |
|---------|------|
| Minutes | mins |
| Hours   | hrs  |
