# Supplementary material for: Insights into mycobacteriome composition in Mycobacterium bovis-infected African buffalo (Syncerus caffer) tissue samples
Source: PubMed Central journal article supplement (PMC11289279; doi:10.1038/s41598-024-68189-x), 2024-07-30
Supplement: 41598_2024_68189_MOESM2_ESM.pdf [file 41598_2024_68189_MOESM2_ESM.pdf]

# MinION Mk1C (MC-114017) Final report

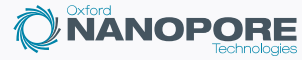

Oct 31, 23, 10:34 AM UTC+2:00 — Nov 1, 23, 7:58 AM UTC+2:00 · 20231031flonglegyrbuffHiP  
 · no\_sample · MC-114017  
 Protocol run ID: af990f6f-af77-4b14-b66b-90ad1094d168

[Run summary](#) | [Run configuration](#) | [Sequence output](#) | [Run health](#) | [Run log](#)

## Run summary

### DATA OUTPUT

|                 |                                   |
|-----------------|-----------------------------------|
| Estimated bases | Reads generated                   |
| 151.53 Mb       | 536.75 k                          |
| Estimated N50   | Total data produced (pass / fail) |
| 229             | 2.48 GB                           |

### RUN DURATION

Run time

21 hrs 22 mins / 24 hrs 0 mins (est)

Elapsed time  Run limit

Run status

**STOPPED** · By user

[View unit abbreviations used in this report](#)

### BASECALLING

|              |                               |          |
|--------------|-------------------------------|----------|
| Reads called | Bases called (min Q score: 9) |          |
| 100%         | 116.87 Mb                     | 20.22 Mb |
|              | Pass                          | Fail     |

## Run configuration

### RUN SETUP

|                    |               |
|--------------------|---------------|
| Flow cell type     | FLO-FLG114    |
| Flow cell ID       | APK571        |
| Kit type           | SQK-NBD114-96 |
| Flongle adapter ID | FA-08678      |

### RUN SETTINGS

|                            |                              |
|----------------------------|------------------------------|
| Run limit                  | 24 hrs                       |
| Active channel selection   | On                           |
| Pore scan freq.            | 1.5 hrs                      |
| Reserved pores             | Off                          |
| Minimum read length        | 20 bp                        |
| Read splitting             | On                           |
| Basecalling                | High-accuracy model, 400 bps |
| Modified basecalling       | Off                          |
| Trim barcodes              | Off                          |
| Mid-read barcode filtering | Off                          |

### DATA OUTPUT SETTINGS

|                      |                                                                                     |
|----------------------|-------------------------------------------------------------------------------------|
| FAST5 output         | Off                                                                                 |
| FASTQ output         | gzip_compress                                                                       |
| FASTQ reads per file | 1000                                                                                |
| BAM output           | Off                                                                                 |
| Bulk file output     | Off                                                                                 |
| Data location        | /data/./20231031flonglegyrbuffHiP/no_sample/20231031_0834_MC-114017_APK571_af990f6f |

### SOFTWARE VERSIONS

|               |          |
|---------------|----------|
| MinKNOW       | 23.07.12 |
| Bream         | 7.7.6    |
| Configuration | 5.7.11   |
| Guppy         | 7.1.4    |
| MinKNOW Core  | 5.7.5    |

## Sequence output

### READ LENGTHS · OUTLIERS REMOVED

The read length graph shows the total number of bases vs the read length. The longest 1% of strands are classified as outliers, and excluded to allow focus on the main body of data.

Legend

■ Basecalled — Estimated

Estimated N50  
**229**

% Basecalled  
**100%**

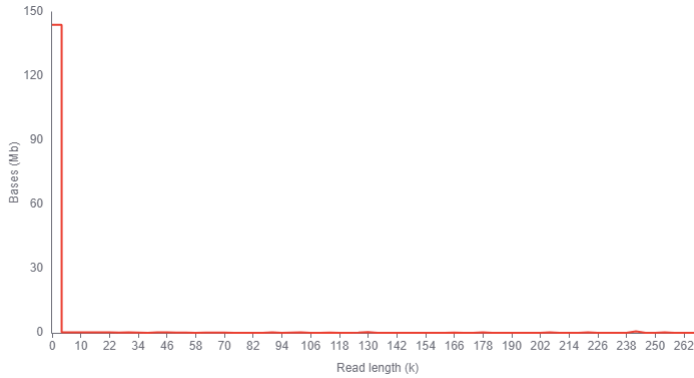

### OUTLIERS

The longest 1% of strands are classified as outliers, and aggregated into groups to show their relative amounts.

| Read length (kb) | Aggregated reads (Mb) |
|------------------|-----------------------|
| 1 - 3            | 1.05                  |
| 3 - 5            | 0.08                  |
| 5 - 7            | 0.02                  |
| 7 - 9            | 0.01                  |
| 9 - 9.25         | 0.01                  |

## BARCODES

[Detected barcodes](#) [Bases graph](#) [Reads graph](#)

Detected barcodes

The total number of bases and reads for each barcode detected are displayed in table below. Reads/bases must have a quality score above 9 to pass.

Unclassified data

**75.98 k (13.3%)**

**20.55 Mb (15%)**

Reads

Bases

Search barcodes

[Export CSV](#)

| Barcode   | Total bases (Mb) | Passed bases (%) | Total reads (k) | Passed reads (%) |   |
|-----------|------------------|------------------|-----------------|------------------|---|
| barcode01 | 0.0029           |                  | 5               | 0.012            |   |
| barcode02 | 0.0018           |                  | 24.5            | 0.008            |   |
| barcode03 | 0.0013           |                  | 31.7            | 0.006            | 3 |
| barcode04 | 0.0012           |                  | 15.9            | 0.006            | 1 |
| barcode05 | 0.0013           |                  | 0               | 0.006            |   |
| barcode06 | 0.0082           |                  | 58.6            | 0.004            |   |
| barcode07 | 0.0012           |                  | 0               | 0.006            |   |
| barcode08 | 0.0045           |                  | 0               | 0.002            |   |
| barcode09 | 0.0083           |                  | 22.9            | 0.004            |   |
| barcode10 | 0.0015           |                  | 14.4            | 0.006            | 1 |
| barcode11 | 0.0072           |                  | 63.6            | 0.003            | 6 |

## CUMULATIVE OUTPUT

The cumulative output shows the total amount of bases or reads sequenced over time by your device.

### Bases

Legend

— Estimated

Predicted total number of bases, prior to basecalling

— Passed

Bases equal to or above the quality score threshold.

— Failed

Bases below the quality score threshold.

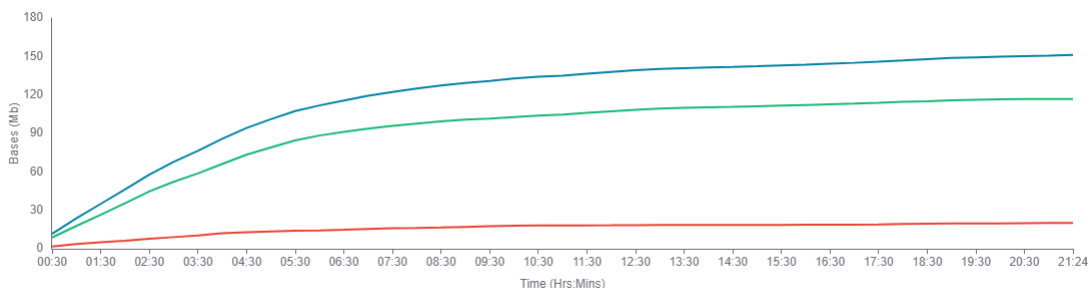

### Reads

#### Legend

- Total**  
Total number of reads, including passed, failed and skipped.
- Passed**  
Reads equal to or above the quality score threshold.
- Failed**  
Reads below the quality score threshold.
- Skipped**  
Reads that will not be basecalled. Post run basecalling is possible.

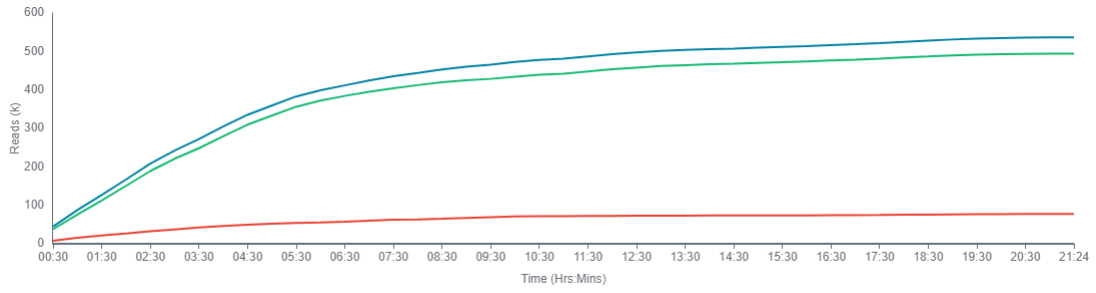

### QUALITY SCORE

The quality score is calculated as basecalling is performed on your device. Reads that fall below the minimum value of 9 will be classified as failed reads. You can alter the accepted minimum quality score in MinKNOW.

**Legend**

- Mode**  
The most frequent quality score of reads in the run.
- Spread**  
The spread of quality scores, found by calculating full width half maximum.
- Min. quality score**  
Minimum quality score to be accepted as a passed read.

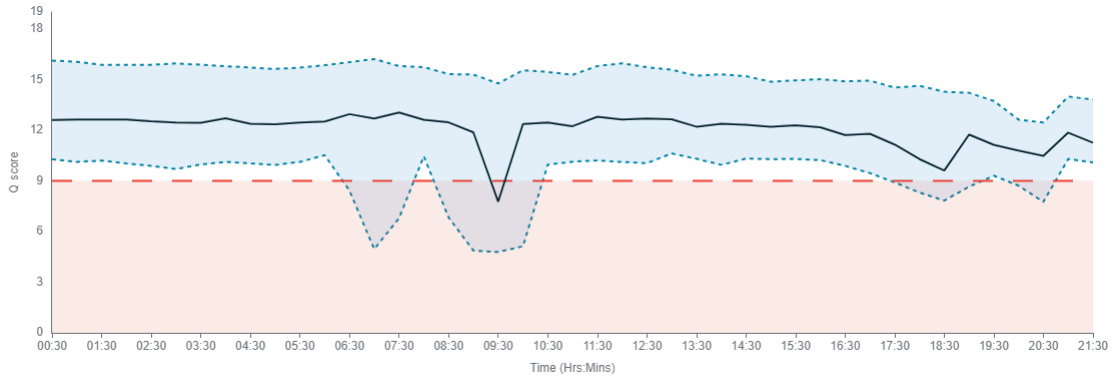

**Troubleshooting**

**Quality score low**  
This can be due to the translocation speed being out of the accepted range, which can correlate to low quality scores. If you see that the translocation speed is out of the accepted range in the below graph, please see the Flow Cell refuelling page linked [here](#) for further troubleshooting.

### Run health

#### PORE ACTIVITY

The Pore activity graph shows the performance of your sample as it is being sequenced during a run.

Show grouped

**Legend**

- **Sequencing**  
Pore currently sequencing
- **Pore available**  
Pore available for sequencing
- **Unavailable**  
Pore currently unavailable for sequencing
- **Inactive**  
Pore no longer suitable for further sequencing
- **Unclassified**  
Pore status unknown

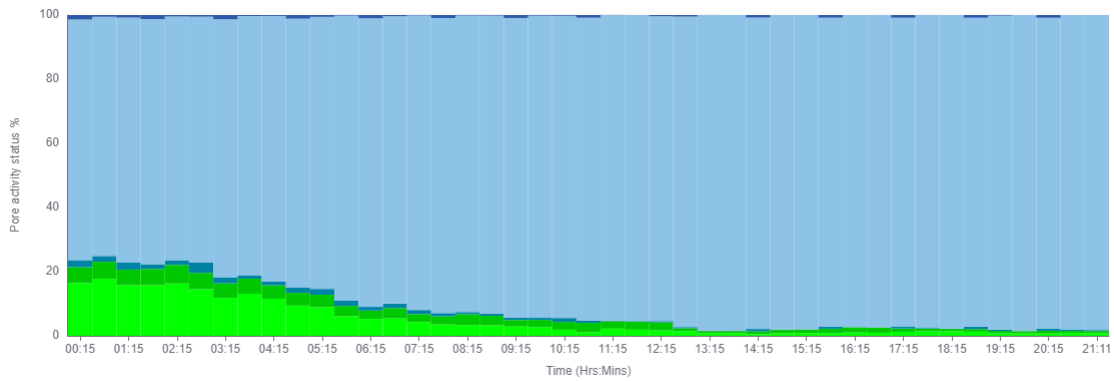

**Troubleshooting**

**General**  
Some commonly seen issues are excess pores classified as Recovering, Open Pore, or Free Adapter. To find out what advice is applicable for your run, visit the [user guide](#).

### PORE SCAN

A Pore scan is performed at configurable time intervals to determine the current status of pores within channels on a Flow Cell. For this run a Pore scan is performed every 1.5 hrs.

Legend

- **Pore available**  
Pore in channel available for sequencing
- **Reserved pore**  
Pore in reserve, will return to available when required
- **Unavailable**  
Pore inhibited from sequencing
- **Saturated**  
Possible contamination in the sample
- **Zero**  
No current is passing through this pore, possibly due to bubbles on the membrane
- **Inactive**  
Pore no longer suitable for further sequencing

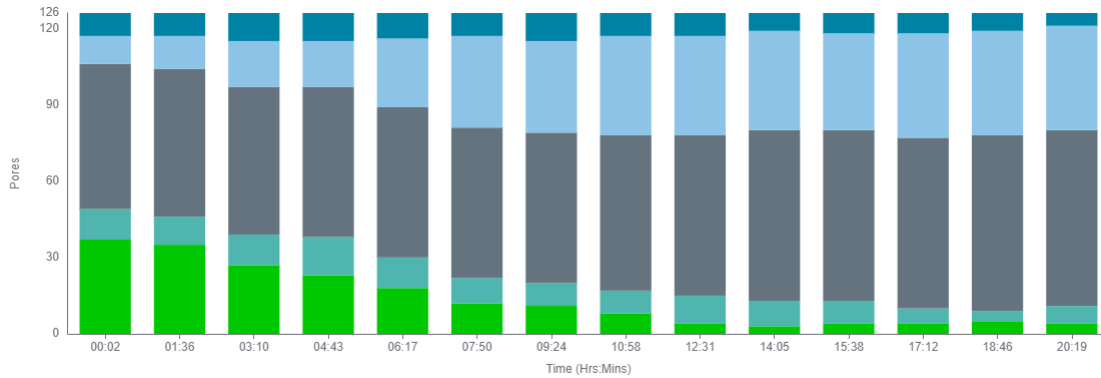

Troubleshooting

**High proportion Unavailable**

Possible contaminants in library blocking the pore. Consider using the Flow Cell Wash Kit, and reloading a library.

**High proportion Inactive**

If localised to one area of the Flow Cell, this could indicate that an air bubble has been introduced during the flushing/loading steps. If inactivity is spread across the Flow Cell this could be caused by improper loading of the library, please refer to the [user guide](#) for further support.

### TRANSLOCATION SPEED

The translocation speed is the rate at which DNA/RNA travels through pores as it is being sequenced.

Legend

- Median
- - - 75% quartile
- - - 25% quartile
- Accepted range

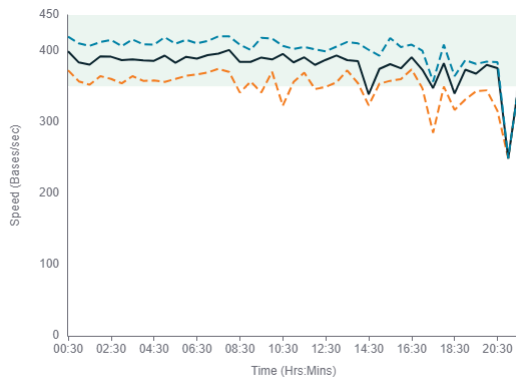

Troubleshooting

**Low speed**

Check that the Flow Cell is within the target temperature range.

**Note**

Low-quality and short reads are not included in this graph.

### TEMPERATURE

The temperature of the Flow Cell over the run time.

Legend

- Measured
- Target

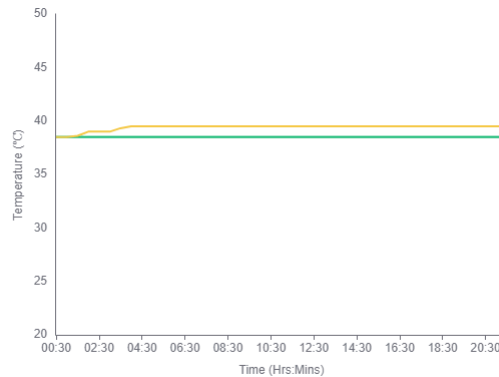

Troubleshooting

**Out of range**

Check that the Flow Cell is correctly seated and firmly pushed down into the device. Ensure ambient temperature is always within the specified range for your device in the [user guide](#).

Air flow should be good but not excessive. Excessive amounts of cool air blowing on the device could prevent it from reaching target temperature.

# Run log

## SYSTEM MESSAGES

System messages are a record of the events that occurred in the time covered by this report.

### Errors

None

### Warnings

None

### Events

**Disk space** · 31 Oct 23, 08:34  
Disk /data has 254 GB space remaining

**Waiting for temperature** · 31 Oct 23, 08:34  
Waiting up to 300 seconds for temperature to stabilise at 38.5°C

**Starting** · 31 Oct 23, 08:35  
Starting sequencing procedure

**Message** · 31 Oct 23, 08:35  
Performing Channel Scan

**Message** · 31 Oct 23, 08:38  
Channel scan for flow cell APK571 has found a total of 37 pores. 37 pores available for immediate sequencing

**Message** · 31 Oct 23, 09:58  
Setting temperature to reach 39.1°C

**Message** · 31 Oct 23, 10:09  
Performing Channel Scan

**Message** · 31 Oct 23, 10:11  
Channel scan for flow cell APK571 has found a total of 35 pores. 35 pores available for immediate sequencing

**Message** · 31 Oct 23, 11:42  
Performing Channel Scan

**Message** · 31 Oct 23, 11:45  
Channel scan for flow cell APK571 has found a total of 27 pores. 27 pores available for immediate sequencing

**Message** · 31 Oct 23, 11:46  
Setting temperature to reach 39.5°C

**Message** · 31 Oct 23, 13:16  
Performing Channel Scan

**Message** · 31 Oct 23, 13:19  
Channel scan for flow cell APK571 has found a total of 23 pores. 23 pores available for immediate sequencing

**Message** · 31 Oct 23, 14:50  
Performing Channel Scan

**Message** · 31 Oct 23, 14:52  
Channel scan for flow cell APK571 has found a total of 18 pores. 18 pores available for immediate sequencing

**Message** · 31 Oct 23, 16:23  
Performing Channel Scan

**Message** · 31 Oct 23, 16:26  
Channel scan for flow cell APK571 has found a total of 12 pores. 12 pores available for immediate sequencing

**Message** · 31 Oct 23, 17:57  
Performing Channel Scan

**Message** · 31 Oct 23, 18:00  
Channel scan for flow cell APK571 has found a total of 11 pores. 11 pores available for immediate sequencing

**Message** · 31 Oct 23, 19:30  
Performing Channel Scan

**Message** · 31 Oct 23, 19:33  
Channel scan for flow cell APK571 has found a total of 8 pores. 8 pores available for immediate sequencing

**Message** · 31 Oct 23, 21:04  
Performing Channel Scan

**Message** · 31 Oct 23, 21:07  
Channel scan for flow cell APK571 has found a total of 4 pores. 4 pores available for immediate sequencing

**Message** · 31 Oct 23, 22:38  
Performing Channel Scan

**Message** · 31 Oct 23, 22:40  
Channel scan for flow cell APK571 has found a total of 3 pores. 3 pores available for immediate sequencing

**Message** · 01 Nov 23, 00:11  
Performing Channel Scan

**Message** · 01 Nov 23, 00:14  
Channel scan for flow cell APK571 has found a total of 4 pores. 4 pores available for immediate sequencing

**Message** · 01 Nov 23, 01:45  
Performing Channel Scan

**Message** · 01 Nov 23, 01:48  
Channel scan for flow cell APK571 has found a total of 4 pores. 4 pores available for immediate sequencing

**Message** · 01 Nov 23, 03:18  
Performing Channel Scan

**Message** · 01 Nov 23, 03:21  
Channel scan for flow cell APK571 has found a total of 5 pores. 5 pores available for immediate sequencing

**Message** · 01 Nov 23, 04:52  
Performing Channel Scan

**Message** · 01 Nov 23, 04:55  
Channel scan for flow cell APK571 has found a total of 4 pores. 4 pores available for immediate sequencing

---

## UNIT ABBREVIATIONS

|          |    |          |    |         |      |
|----------|----|----------|----|---------|------|
| Byte     | B  | Base     | b  | Minutes | mins |
| Kilobyte | KB | Kilobase | kb | Hours   | hrs  |
| Megabyte | MB | Megabase | Mb |         |      |
| Gigabyte | GB | Gigabase | Gb |         |      |
| Terabyte | TB | Terabase | Tb |         |      |
